# Supplementary material for: Seed Transmission of Epichloë Endophytes in Lolium perenne Is Heavily Influenced by Host Genetics
Source: PubMed Central journal article supplement (PMC6242978; doi:10.3389/fpls.2018.01580), 2018-11-13
Supplement: Data_Sheet_1.pdf [file Data_Sheet_1.pdf]

*Supplementary Material*

**Seed transmission of *Epichloë* endophytes in *Lolium perenne* is heavily influenced by host genetics**

**Milan Gagic<sup>1</sup>, Marty J. Faville<sup>1</sup>, Wei Zhang<sup>1</sup>, Natasha T. Forester<sup>1</sup>, M. Philip Rolston<sup>2</sup>, Richard D. Johnson<sup>1</sup>, Siva Ganesh<sup>1</sup>, John P. Koolaard<sup>1</sup>, H. Sydney Easton<sup>1</sup>, Debbie Hudson<sup>1</sup>, Linda J. Johnson<sup>1</sup>, Christina D. Moon<sup>1</sup> and Christine R. Voisey<sup>1\*</sup>**

<sup>1</sup>AgResearch, Grasslands Research Centre, Palmerston North, New Zealand

<sup>2</sup>The Foundation for Arable Research, Templeton, Christchurch, New Zealand

**\*Correspondence:** Christine R. Voisey, [christine.voisey@agresearch.co.nz](mailto:christine.voisey@agresearch.co.nz)

**Supplementary Figure 1.** Total rainfall (right) and mean, maximum and minimum temperature (left) each month at the Grasslands (GRLDS) and Lincoln (LINC) Research Centres during the 12 month periods that the seed transmission trials were conducted.

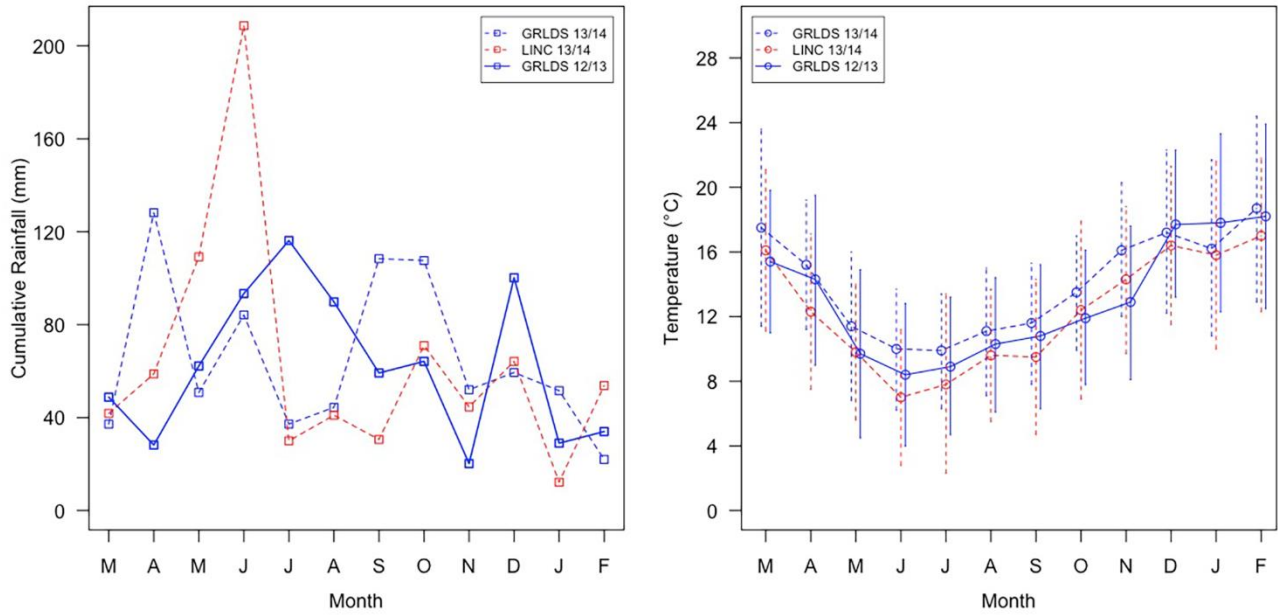

**Supplementary Figure 2.** Genomic-estimated breeding values (GEBVs) plotted against observed phenotypic values (BLUP-adjusted means) for endophyte transmission % in the ryegrass training set. Panel A, full dataset, B, reduced dataset of  $n = 81$ , based on random selection of individuals within each of the intervals 0 – 20 ( $n = 5$ ), 21 – 40 ( $n = 16$ ), 41 – 60 ( $n = 20$ ), 61 – 80 ( $n = 20$ ) and 81 – 100 ( $n = 20$ ). GEBVs were determined using the KGD statistical method.

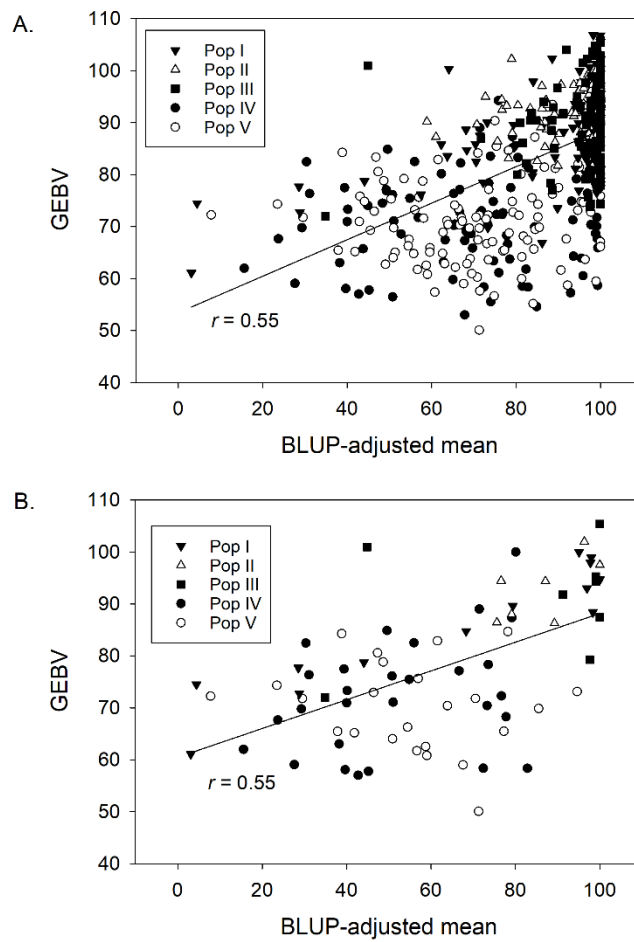

**Supplementary Figure 3.** Relationships between % viable endophyte transmission and seedling emergence rates for Populations I-V (panels A to E), and all populations together (F). Data has been arcsin transformed and simple linear regression analysis is shown.

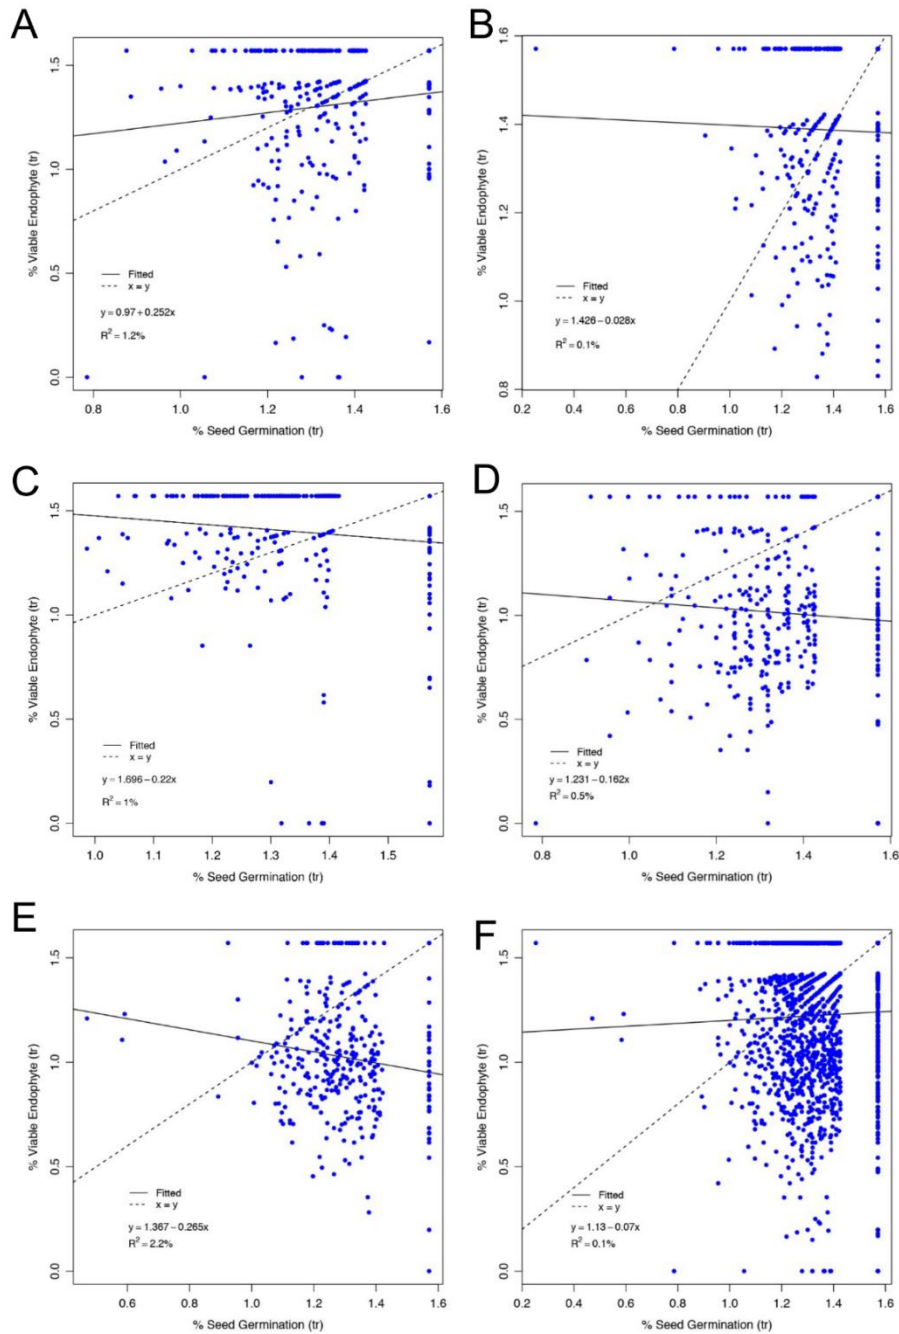

**Supplementary Table 1.** Genetic structure of Population III showing the relationships between maternal parent genotypes as half-sibling families.

| Family | Parent genotype IDs |     |     |
|--------|---------------------|-----|-----|
| 1      | 111                 | 112 |     |
| 2      | 121                 | 122 | 123 |
| 3      | 131                 | 132 |     |
| 4      | 141                 | 142 | 143 |
| 5      | 151                 | 152 |     |
| 6      | 211                 | 212 | 213 |
| 7      | 221                 | 222 |     |
| 8      | 231                 | 232 | 233 |
| 9      | 242                 |     |     |
| 10     | 251                 | 252 | 253 |
| 11     | 311                 | 312 |     |
| 12     | 321                 | 322 | 323 |
| 13     | 331                 |     |     |
| 14     | 341                 | 342 | 343 |
| 15     | 351                 | 352 |     |
| 16     | 411                 | 412 | 413 |
| 17     | 421                 | 422 |     |
| 18     | 431                 | 432 |     |
| 19     | 441                 | 442 |     |
| 20     | 451                 | 452 | 453 |
| 21     | 511                 | 512 |     |
| 22     | 521                 |     |     |
| 23     | 531                 | 532 |     |
| 24     | 541                 | 543 |     |
| 25     | 551                 | 552 |     |
| 26     | 612                 | 613 |     |
| 27     | 621                 | 622 |     |
| 28     | 631                 | 632 |     |
| 29     | 641                 | 642 |     |
| 30     | 651                 | 652 |     |
| 31     | 711                 | 712 |     |
| 32     | 721                 | 722 | 723 |
| 33     | 731                 |     |     |
| 34     | 741                 | 742 | 743 |
| 35     | 751                 | 752 |     |
| 36     | 811                 | 812 |     |
| 37     | 821                 |     |     |

|    |      |      |      |
|----|------|------|------|
| 38 | 831  | 832  | 833  |
| 39 | 841  | 842  |      |
| 40 | 851  | 852  | 853  |
| 41 | 911  | 912  |      |
| 42 | 921  | 922  | 923  |
| 43 | 931  | 932  |      |
| 44 | 941  | 942  | 943  |
| 45 | 951  | 952  |      |
| 46 | 1011 | 1012 |      |
| 47 | 1021 | 1022 |      |
| 48 | 1031 | 1032 | 1033 |
| 49 | 1041 | 1042 | 1051 |
| 50 | 1052 | 1053 |      |

---

**Supplementary Table 2.** ANOVA for % viable endophyte transmission rates<sup>1</sup> within Population III.

| Source of variation  | df  | MS    | F      | <i>P</i> -value |
|----------------------|-----|-------|--------|-----------------|
| HS families          | 49  | 0.491 | 2.044  | 0.021           |
| Lines in HS families | 63  | 0.240 | 12.522 | 1.52E-45        |
| Error                | 224 | 0.019 |        |                 |
| Total                | 36  |       |        |                 |

<sup>1</sup> Endophyte transmission rates are from seed harvested in 2013. Data has been arcsin transformed.

**Supplementary Table 3.** Observed % viable endophyte transmission and GEBV data

| Population | Genotype ID | % viable endophyte transmission (BLUP) | GEBV <sup>1</sup> mean | GEBV SE <sup>2</sup> |
|------------|-------------|----------------------------------------|------------------------|----------------------|
| I          | 1           | 94.79                                  | 89.96                  | 2.85                 |
| I          | 2           | 28.57                                  | 77.71                  | 2.07                 |
| I          | 3           | 80.20                                  | 85.92                  | 2.23                 |
| I          | 4           | 84.07                                  | 97.91                  | 1.79                 |
| I          | 5           | 63.73                                  | 83.55                  | 2.42                 |
| I          | 6           | 44.07                                  | 78.75                  | 1.07                 |
| I          | 8           | 100.00                                 | 78.88                  | 0.65                 |
| I          | 9           | 100.00                                 | 106.79                 | 0.79                 |
| I          | 10          | 93.51                                  | 89.03                  | 1.64                 |
| I          | 11          | 99.02                                  | 85.85                  | 0.92                 |
| I          | 13          | 91.34                                  | 88.28                  | 1.41                 |
| I          | 14          | 97.44                                  | 100.62                 | 1.53                 |
| I          | 15          | 100.00                                 | 100.40                 | 1.02                 |
| I          | 17          | 95.65                                  | 84.83                  | 0.95                 |
| I          | 18          | 94.85                                  | 85.83                  | 2.45                 |
| I          | 19          | 98.95                                  | 82.52                  | 1.50                 |
| I          | 20          | 96.62                                  | 90.59                  | 2.58                 |
| I          | 21          | 97.46                                  | 84.31                  | 2.59                 |
| I          | 23          | 100.00                                 | 92.98                  | 2.42                 |
| I          | 24          | 94.69                                  | 83.25                  | 1.18                 |
| I          | 25          | 3.09                                   | 61.12                  | 2.42                 |
| I          | 26          | 99.16                                  | 94.25                  | 1.89                 |
| I          | 27          | 95.06                                  | 100.00                 | 1.32                 |
| I          | 28          | 96.75                                  | 91.37                  | 2.19                 |
| I          | 30          | 99.04                                  | 96.92                  | 1.49                 |
| I          | 31          | 100.00                                 | 81.23                  | 1.62                 |
| I          | 32          | 96.94                                  | 93.00                  | 2.76                 |
| I          | 33          | 97.96                                  | 98.93                  | 1.73                 |
| I          | 37          | 89.83                                  | 73.55                  | 3.41                 |
| I          | 38          | 73.17                                  | 90.03                  | 1.71                 |
| I          | 39          | 97.92                                  | 90.89                  | 5.28                 |
| I          | 40          | 97.35                                  | 87.89                  | 1.62                 |
| I          | 43          | 100.00                                 | 94.18                  | 0.87                 |
| I          | 44          | 93.97                                  | 93.56                  | 1.86                 |
| I          | 45          | 95.45                                  | 97.80                  | 4.05                 |
| I          | 47          | 97.86                                  | 88.54                  | 2.17                 |
| I          | 48          | 99.04                                  | 83.67                  | 3.04                 |



|   |     |        |        |      |
|---|-----|--------|--------|------|
| I | 49  | 97.14  | 82.25  | 3.44 |
| I | 51  | 64.10  | 100.35 | 2.49 |
| I | 53  | 100.00 | 94.69  | 0.85 |
| I | 56  | 98.96  | 101.32 | 1.07 |
| I | 57  | 97.92  | 83.89  | 2.25 |
| I | 59  | 100.00 | 78.13  | 2.48 |
| I | 60  | 97.39  | 96.41  | 1.92 |
| I | 62  | 86.17  | 66.85  | 1.96 |
| I | 63  |        | 87.75  | 2.11 |
| I | 64  | 70.40  | 85.89  | 2.31 |
| I | 66  | 87.36  | 90.57  | 1.97 |
| I | 67  | 89.23  | 83.38  | 1.11 |
| I | 68  | 98.96  | 89.32  | 3.13 |
| I | 70  | 73.33  | 69.79  | 2.09 |
| I | 71  | 71.43  | 87.48  | 3.76 |
| I | 72  | 72.19  | 78.50  | 0.85 |
| I | 73  | 97.70  | 85.53  | 1.24 |
| I | 76  | 100.00 | 99.40  | 1.75 |
| I | 77  | 96.40  | 80.20  | 2.39 |
| I | 78  | 83.96  | 80.42  | 1.36 |
| I | 81  | 70.53  | 82.50  | 2.55 |
| I | 82  | 98.08  | 80.46  | 3.01 |
| I | 83  | 94.21  | 92.56  | 2.81 |
| I | 84  | 94.68  | 86.44  | 2.22 |
| I | 85  | 97.78  | 97.93  | 1.34 |
| I | 86  | 97.44  | 90.59  | 1.51 |
| I | 88  | 99.41  | 76.98  | 5.54 |
| I | 89  | 98.33  | 92.92  | 1.03 |
| I | 90  | 83.87  | 79.71  | 1.51 |
| I | 92  | 4.42   | 74.51  | 2.16 |
| I | 93  | 96.59  | 83.02  | 2.80 |
| I | 95  | 95.45  | 92.39  | 1.48 |
| I | 96  | 99.32  | 81.91  | 2.13 |
| I | 97  | 62.28  | 85.81  | 1.14 |
| I | 98  | 98.29  | 106.87 | 1.68 |
| I | 99  | 97.66  | 88.02  | 2.20 |
| I | 100 | 68.32  | 84.74  | 3.80 |
| I | 101 | 57.48  | 76.16  | 0.70 |
| I | 102 | 97.09  | 87.60  | 1.87 |
| I | 103 | 98.33  | 88.41  | 1.46 |
| I | 105 | 98.48  | 89.56  | 1.15 |
| I | 108 | 97.52  | 96.58  | 3.03 |

## Supplementary Material

|    |     |        |        |      |
|----|-----|--------|--------|------|
| I  | 109 | 99.30  | 102.78 | 1.99 |
| I  | 110 | 100.00 | 105.57 | 1.29 |
| I  | 112 | 96.25  | 83.78  | 2.28 |
| I  | 113 | 100.00 | 77.43  | 2.04 |
| I  | 114 | 100.00 | 94.32  | 1.99 |
| I  | 115 | 99.31  | 81.85  | 2.77 |
| I  | 116 | 100.00 | 102.25 | 1.75 |
| I  | 119 | 99.12  | 76.54  | 7.58 |
| I  | 121 | 100.00 | 92.11  | 1.96 |
| I  | 123 | 86.36  | 89.60  | 1.15 |
| I  | 124 | 79.38  | 89.62  | 3.28 |
| I  | 125 | 100.00 | 92.46  | 1.11 |
| I  | 126 | 28.79  | 72.75  | 1.99 |
| I  | 128 | 88.54  | 102.34 | 1.11 |
| I  | 129 | 94.06  | 81.14  | 0.57 |
| I  | 130 | 94.87  | 76.96  | 2.41 |
| I  | 131 | 100.00 | 80.98  | 2.43 |
| I  | 132 | 68.14  | 88.64  | 1.08 |
| II | 1   | 96.30  | 101.97 | 1.22 |
| II | 2   | 97.14  | 86.98  | 0.99 |
| II | 4   | 100.00 | 96.46  | 0.74 |
| II | 5   | 93.67  | 91.26  | 2.53 |
| II | 6   | 100.00 | 103.06 | 1.56 |
| II | 7   | 96.04  | 96.65  | 0.87 |
| II | 8   | 97.06  | 91.36  | 1.25 |
| II | 9   | 98.00  | 87.03  | 1.73 |
| II | 10  | 87.21  | 88.68  | 1.76 |
| II | 11  | 97.67  | 90.14  | 1.22 |
| II | 12  | 95.28  | 88.11  | 1.59 |
| II | 13  | 100.00 | 91.88  | 1.50 |
| II | 14  | 89.25  | 91.44  | 1.10 |
| II | 15  | 75.61  | 86.39  | 1.96 |
| II | 16  | 89.87  | 81.72  | 0.75 |
| II | 17  | 100.00 | 95.29  | 1.52 |
| II | 18  | 98.78  | 91.86  | 0.90 |
| II | 19  | 100.00 | 96.52  | 1.52 |
| II | 20  | 100.00 | 97.47  | 0.93 |
| II | 21  | 58.88  | 90.19  | 0.84 |
| II | 22  | 86.79  | 90.08  | 1.91 |
| II | 23  | 98.77  | 88.92  | 1.06 |
| II | 24  | 86.84  | 85.28  | 0.76 |

|    |    |        |        |      |
|----|----|--------|--------|------|
| II | 25 | 96.39  | 96.81  | 1.36 |
| II | 26 | 97.94  | 93.41  | 1.69 |
| II | 27 | 97.06  | 99.29  | 1.28 |
| II | 28 | 87.10  | 94.34  | 0.66 |
| II | 29 | 100.00 | 87.76  | 1.17 |
| II | 30 | 100.00 | 93.57  | 0.73 |
| II | 31 | 100.00 | 93.38  | 0.78 |
| II | 32 | 78.21  | 83.12  | 1.61 |
| II | 33 | 95.12  | 97.57  | 1.40 |
| II | 34 | 87.50  | 93.44  | 1.08 |
| II | 35 | 100.00 | 92.95  | 1.79 |
| II | 37 | 94.67  | 94.55  | 1.23 |
| II | 38 | 93.68  | 97.28  | 1.17 |
| II | 39 | 95.12  | 96.33  | 1.53 |
| II | 40 | 100.00 | 91.48  | 0.66 |
| II | 43 | 85.00  | 82.61  | 1.03 |
| II | 44 | 95.15  | 97.64  | 1.13 |
| II | 45 | 98.85  | 90.37  | 0.65 |
| II | 46 | 100.00 | 97.00  | 2.27 |
| II | 48 | 98.23  | 93.11  | 0.29 |
| II | 49 | 98.68  | 91.16  | 1.93 |
| II | 50 | 99.17  | 95.47  | 1.09 |
| II | 51 | 100.00 | 94.68  | 1.23 |
| II | 52 | 96.47  | 92.22  | 0.53 |
| II | 53 | 98.70  | 92.59  | 1.10 |
| II | 54 | 97.26  | 87.89  | 1.62 |
| II | 55 | 100.00 | 93.76  | 2.25 |
| II | 56 | 88.66  | 88.25  | 0.45 |
| II | 57 | 96.94  | 98.31  | 0.99 |
| II | 58 | 79.09  | 87.97  | 1.10 |
| II | 59 | 72.73  | 94.99  | 1.43 |
| II | 60 | 70.73  | 89.65  | 1.15 |
| II | 61 | 99.06  | 90.25  | 2.59 |
| II | 62 | 77.78  | 93.25  | 1.64 |
| II | 63 | 87.50  | 93.37  | 0.42 |
| II | 64 | 99.05  | 94.07  | 0.92 |
| II | 65 | 98.91  | 87.53  | 1.66 |
| II | 66 | 100.00 | 94.92  | 1.54 |
| II | 67 | 97.50  | 95.31  | 0.24 |
| II | 68 | 97.22  | 95.38  | 1.23 |
| II | 69 |        | 102.23 | 0.93 |
| II | 70 | 86.11  | 97.05  | 1.09 |

## Supplementary Material

|    |     |        |        |      |
|----|-----|--------|--------|------|
| II | 71  | 83.33  | 92.71  | 0.74 |
| II | 72  | 61.02  | 87.25  | 1.05 |
| II | 73  | 100.00 | 95.24  | 0.94 |
| II | 74  | 99.12  | 93.23  | 1.58 |
| II | 75  | 85.45  | 90.23  | 0.71 |
| II | 76  | 97.06  | 91.40  | 0.83 |
| II | 77  | 97.80  | 96.27  | 1.31 |
| II | 78  | 98.68  | 90.25  | 0.77 |
| II | 79  | 98.21  | 89.08  | 0.66 |
| II | 80  | 98.91  | 91.76  | 1.88 |
| II | 81  | 96.00  | 93.68  | 0.58 |
| II | 82  | 97.83  | 90.19  | 0.61 |
| II | 83  | 99.22  | 94.48  | 1.79 |
| II | 84  | 99.03  | 93.16  | 1.29 |
| II | 85  | 99.04  | 100.12 | 0.67 |
| II | 86  | 88.97  | 91.38  | 1.39 |
| II | 87  | 99.29  | 89.66  | 1.83 |
| II | 88  | 90.68  | 97.30  | 0.61 |
| II | 89  | 97.94  | 94.30  | 0.74 |
| II | 90  | 98.84  | 93.93  | 2.25 |
| II | 92  | 93.20  | 91.91  | 0.84 |
| II | 93  | 100.00 | 98.07  | 0.63 |
| II | 95  | 89.09  | 91.62  | 1.48 |
| II | 96  | 98.11  | 97.32  | 0.41 |
| II | 97  | 94.07  | 91.82  | 0.81 |
| II | 98  | 96.67  | 93.13  | 1.29 |
| II | 99  | 100.00 | 94.38  | 0.96 |
| II | 100 | 76.67  | 92.46  | 2.01 |
| II | 101 | 87.37  | 92.69  | 1.06 |
| II | 102 | 98.75  | 84.44  | 1.65 |
| II | 103 | 76.61  | 94.43  | 0.99 |
| II | 104 | 100.00 | 94.61  | 1.40 |
| II | 105 | 85.88  | 89.09  | 2.51 |
| II | 108 | 99.19  | 98.47  | 1.39 |
| II | 109 | 99.01  | 94.85  | 1.05 |
| II | 110 | 97.78  | 84.26  | 2.14 |
| II | 111 | 94.92  | 96.20  | 0.57 |
| II | 112 | 100.00 | 90.26  | 0.98 |
| II | 113 | 96.81  | 96.09  | 1.63 |
| II | 114 | 80.43  | 93.36  | 1.41 |
| II | 115 | 100.00 | 93.61  | 0.92 |

|     |     |        |        |      |
|-----|-----|--------|--------|------|
| II  | 116 | 90.11  | 87.82  | 0.92 |
| II  | 117 | 90.91  | 91.38  | 1.26 |
| II  | 119 | 89.25  | 86.25  | 1.14 |
| II  | 120 | 86.17  | 92.76  | 1.59 |
| III | 111 |        | 84.15  | 2.38 |
| III | 112 | 80.23  | 79.97  | 5.31 |
| III | 113 |        | 91.75  | 3.67 |
| III | 121 | 95.65  | 87.73  | 4.50 |
| III | 122 | 44.83  | 100.99 | 1.51 |
| III | 131 | 96.85  | 102.28 | 1.21 |
| III | 132 | 100.00 | 94.63  | 2.55 |
| III | 141 | 82.47  | 82.19  | 2.21 |
| III | 142 | 99.09  | 89.35  | 1.22 |
| III | 143 | 100.00 | 86.40  | 1.46 |
| III | 151 | 100.00 | 77.93  | 4.91 |
| III | 152 | 100.00 | 83.38  | 3.23 |
| III | 211 | 100.00 | 91.79  | 3.60 |
| III | 212 | 98.89  | 83.61  | 1.89 |
| III | 213 | 83.70  | 91.78  | 1.41 |
| III | 221 | 100.00 | 78.88  | 2.51 |
| III | 222 | 100.00 | 91.78  | 1.20 |
| III | 231 | 97.50  | 73.81  | 1.68 |
| III | 232 | 95.24  | 93.19  | 1.29 |
| III | 233 | 96.81  | 90.69  | 2.74 |
| III | 242 | 98.95  | 80.82  | 3.17 |
| III | 251 | 100.00 | 74.37  | 2.16 |
| III | 252 |        | 87.91  | 1.83 |
| III | 253 | 34.83  | 71.99  | 0.82 |
| III | 311 | 100.00 | 101.53 | 2.63 |
| III | 312 | 81.00  | 89.99  | 2.30 |
| III | 321 | 97.67  | 92.59  | 1.54 |
| III | 322 | 98.61  | 91.19  | 2.95 |
| III | 323 | 99.12  | 94.31  | 2.93 |
| III | 331 | 96.51  | 97.70  | 1.14 |
| III | 341 | 98.99  | 83.79  | 2.74 |
| III | 342 | 96.47  | 91.37  | 3.46 |
| III | 343 | 95.45  | 85.42  | 3.13 |
| III | 351 | 94.44  | 95.07  | 1.33 |
| III | 352 | 97.53  | 86.15  | 2.08 |
| III | 411 | 91.95  | 104.05 | 2.23 |
| III | 412 | 98.98  | 94.32  | 1.60 |
| III | 413 | 100.00 | 90.32  | 2.28 |

## Supplementary Material

|     |     |        |        |      |
|-----|-----|--------|--------|------|
| III | 421 | 91.18  | 91.77  | 1.95 |
| III | 422 | 100.00 | 97.33  | 1.94 |
| III | 431 | 88.89  | 92.89  | 1.59 |
| III | 432 | 97.75  | 93.86  | 2.39 |
| III | 441 | 100.00 | 92.62  | 3.36 |
| III | 442 | 100.00 | 88.04  | 2.31 |
| III | 451 | 89.06  | 85.04  | 6.23 |
| III | 452 | 98.81  | 104.18 | 1.77 |
| III | 453 | 81.58  | 86.10  | 1.32 |
| III | 511 | 97.87  | 98.92  | 1.77 |
| III | 512 | 100.00 | 94.03  | 3.18 |
| III | 521 | 95.08  | 86.30  | 3.39 |
| III | 531 | 83.33  | 90.44  | 2.23 |
| III | 532 | 88.64  | 77.02  | 3.64 |
| III | 541 | 88.33  | 88.60  | 1.48 |
| III | 543 | 95.83  | 101.54 | 0.89 |
| III | 551 | 99.17  | 85.03  | 2.42 |
| III | 552 | 100.00 | 101.32 | 1.07 |
| III | 612 | 84.78  | 90.42  | 3.79 |
| III | 613 | 88.51  | 90.44  | 2.16 |
| III | 621 | 100.00 | 102.90 | 2.86 |
| III | 622 | 96.74  | 84.23  | 5.39 |
| III | 631 | 96.43  | 79.12  | 2.27 |
| III | 632 | 100.00 | 95.50  | 3.92 |
| III | 641 | 100.00 | 87.39  | 3.64 |
| III | 642 | 100.00 | 90.20  | 1.69 |
| III | 651 | 100.00 | 105.80 | 2.44 |
| III | 652 | 98.80  | 104.78 | 1.35 |
| III | 711 | 100.00 | 105.38 | 2.08 |
| III | 712 | 98.89  | 86.46  | 1.73 |
| III | 721 | 99.03  | 94.59  | 1.53 |
| III | 722 | 100.00 | 90.98  | 2.51 |
| III | 723 | 100.00 | 98.32  | 1.89 |
| III | 731 | 89.74  | 96.69  | 0.83 |
| III | 741 | 99.09  | 104.02 | 1.03 |
| III | 742 | 100.00 | 91.88  | 1.56 |
| III | 743 | 99.05  | 95.22  | 0.55 |
| III | 751 | 97.67  | 74.39  | 6.20 |
| III | 752 |        | 92.06  | 1.41 |
| III | 811 | 86.52  | 94.03  | 2.87 |
| III | 812 | 98.55  | 84.77  | 0.93 |

|     |      |        |        |      |
|-----|------|--------|--------|------|
| III | 821  | 97.10  | 75.64  | 1.20 |
| III | 831  | 100.00 | 98.07  | 2.55 |
| III | 832  | 88.16  | 78.32  | 1.37 |
| III | 833  | 94.37  | 93.89  | 1.67 |
| III | 841  | 99.09  | 97.51  | 1.11 |
| III | 842  | 99.00  | 96.31  | 2.51 |
| III | 852  | 96.47  | 84.40  | 2.43 |
| III | 853  | 100.00 | 98.70  | 2.00 |
| III | 911  | 97.89  | 91.05  | 2.56 |
| III | 912  | 98.33  | 90.53  | 2.62 |
| III | 921  | 100.00 | 79.90  | 1.48 |
| III | 922  | 100.00 | 80.71  | 2.85 |
| III | 923  | 100.00 | 86.07  | 2.35 |
| III | 931  | 71.72  | 87.01  | 1.88 |
| III | 932  | 97.59  | 79.27  | 2.73 |
| III | 941  | 100.00 | 81.98  | 2.96 |
| III | 942  | 100.00 | 100.55 | 2.21 |
| III | 943  | 100.00 | 92.50  | 1.11 |
| III | 951  | 99.07  | 93.33  | 1.72 |
| III | 952  | 100.00 | 86.59  | 2.04 |
| III | 1011 | 98.82  | 102.87 | 2.34 |
| III | 1012 | 100.00 | 85.22  | 1.27 |
| III | 1021 | 100.00 | 90.85  | 2.66 |
| III | 1022 | 98.15  | 103.71 | 1.66 |
| III | 1031 | 100.00 | 89.07  | 2.39 |
| III | 1032 | 100.00 | 99.04  | 2.02 |
| III | 1033 | 96.63  | 89.53  | 2.31 |
| III | 1041 | 98.57  | 94.30  | 0.47 |
| III | 1042 | 98.88  | 89.89  | 7.11 |
| III | 1051 | 100.00 | 99.96  | 2.10 |
| III | 1052 | 99.00  | 98.61  | 1.66 |
| III | 1053 | 100.00 | 99.48  | 1.78 |
| IV  | 2    | 76.87  | 72.64  | 4.57 |
| IV  | 3    | 78.03  | 66.65  | 4.14 |
| IV  | 4    | 30.34  | 82.46  | 1.21 |
| IV  | 5    | 94.32  | 79.17  | 1.71 |
| IV  | 6    | 72.39  | 58.38  | 1.04 |
| IV  | 7    | 79.13  | 87.35  | 0.95 |
| IV  | 8    | 50.78  | 56.48  | 0.97 |
| IV  | 9    | 78.52  | 63.74  | 3.07 |
| IV  | 11   | 75.41  | 72.33  | 3.34 |
| IV  | 12   | 77.78  | 68.29  | 2.54 |

## Supplementary Material

|    |    |       |       |      |
|----|----|-------|-------|------|
| IV | 13 | 43.75 | 65.74 | 3.42 |
| IV | 14 | 68.18 | 69.10 | 2.00 |
| IV | 15 | 80.45 | 83.28 | 2.82 |
| IV | 17 | 49.55 | 84.88 | 1.35 |
| IV | 18 | 66.91 | 82.23 | 3.01 |
| IV | 19 | 62.31 | 80.16 | 2.41 |
| IV | 21 | 96.91 | 76.41 | 2.81 |
| IV | 23 | 98.88 | 78.40 | 2.35 |
| IV | 24 | 38.21 | 63.05 | 1.26 |
| IV | 25 | 31.07 | 76.34 | 3.47 |
| IV | 26 | 39.67 | 58.08 | 2.73 |
| IV | 29 | 84.42 | 69.95 | 4.27 |
| IV | 30 | 92.91 | 57.27 | 2.19 |
| IV | 31 | 62.83 | 63.20 | 1.71 |
| IV | 32 | 65.26 | 70.23 | 4.65 |
| IV | 33 | 74.62 | 74.82 | 3.57 |
| IV | 34 | 84.91 | 54.58 | 3.07 |
| IV | 35 | 39.38 | 77.48 | 1.84 |
| IV | 36 | 51.05 | 71.08 | 1.68 |
| IV | 37 | 68.53 | 69.65 | 2.88 |
| IV | 39 | 73.95 | 83.54 | 1.53 |
| IV | 40 | 93.46 | 71.28 | 3.55 |
| IV | 42 | 71.43 | 89.01 | 3.05 |
| IV | 43 | 79.17 | 85.15 | 2.71 |
| IV | 44 | 73.30 | 70.42 | 2.43 |
| IV | 45 | 66.67 | 72.75 | 2.47 |
| IV | 46 | 65.49 | 70.47 | 2.70 |
| IV | 47 | 66.67 | 77.11 | 4.68 |
| IV | 48 | 63.21 | 67.44 | 1.47 |
| IV | 49 | 15.60 | 61.99 | 1.03 |
| IV | 50 | 69.33 | 68.66 | 3.13 |
| IV | 52 | 49.31 | 76.85 | 2.61 |
| IV | 53 | 27.61 | 59.08 | 4.74 |
| IV | 54 | 99.37 | 65.93 | 3.07 |
| IV | 55 | 48.35 | 74.51 | 1.39 |
| IV | 56 | 0.72  | 72.89 | 1.98 |
| IV | 57 | 78.76 | 77.49 | 3.25 |
| IV | 58 | 50.76 | 76.12 | 1.13 |
| IV | 59 | 65.22 | 76.35 | 2.60 |
| IV | 60 | 73.56 | 78.31 | 5.27 |
| IV | 64 | 52.78 | 68.57 | 2.26 |



|    |     |        |       |      |
|----|-----|--------|-------|------|
| IV | 65  | 75.81  | 94.25 | 2.45 |
| IV | 67  | 44.86  | 74.07 | 0.76 |
| IV | 68  | 74.68  | 63.40 | 1.34 |
| IV | 69  | 75.93  | 61.12 | 4.84 |
| IV | 70  | 65.03  | 59.81 | 4.38 |
| IV | 71  | 56.86  | 71.77 | 1.15 |
| IV | 72  | 54.86  | 75.46 | 3.42 |
| IV | 73  | 40.13  | 73.32 | 3.67 |
| IV | 74  | 55.97  | 82.51 | 1.28 |
| IV | 75  | 82.98  | 81.29 | 2.43 |
| IV | 77  | 69.71  | 65.86 | 1.22 |
| IV | 78  | 23.72  | 67.66 | 3.83 |
| IV | 79  | 45.18  | 57.78 | 0.86 |
| IV | 80  | 29.27  | 69.78 | 2.69 |
| IV | 82  | 93.15  | 74.90 | 3.14 |
| IV | 83  | 49.22  | 77.09 | 2.63 |
| IV | 84  | 40.00  | 70.95 | 6.91 |
| IV | 85  | 82.35  | 61.82 | 1.76 |
| IV | 86  | 42.74  | 57.02 | 7.38 |
| IV | 87  | 95.88  | 60.54 | 2.53 |
| IV | 88  | 93.62  | 64.31 | 2.33 |
| IV | 89  | 97.71  | 70.37 | 5.42 |
| IV | 90  | 99.31  | 58.68 | 3.76 |
| IV | 92  | 98.84  | 68.72 | 1.80 |
| IV | 95  | 71.60  | 72.77 | 4.51 |
| IV | 96  | 81.51  | 58.51 | 1.90 |
| IV | 97  | 99.06  | 70.07 | 3.68 |
| IV | 98  | 99.12  | 77.79 | 2.18 |
| IV | 99  | 98.91  | 83.36 | 2.87 |
| IV | 101 | 100.00 | 90.20 | 2.68 |
| IV | 102 | 95.45  | 63.92 | 1.08 |
| IV | 103 | 99.34  | 77.28 | 2.14 |
| IV | 104 | 67.86  | 67.29 | 1.61 |
| IV | 107 | 99.14  | 71.75 | 3.28 |
| IV | 108 | 100.00 | 80.08 | 2.75 |
| IV | 109 | 76.67  | 72.29 | 1.11 |
| IV | 110 | 74.02  | 55.53 | 4.75 |
| IV | 111 | 67.83  | 53.01 | 4.26 |
| IV | 112 | 99.20  | 67.71 | 1.34 |
| IV | 114 | 82.86  | 58.36 | 2.65 |
| IV | 115 | 71.83  | 73.03 | 3.56 |
| IV | 116 | 97.44  | 80.92 | 1.94 |

## Supplementary Material

|   |    |       |       |      |
|---|----|-------|-------|------|
| V | 1  | 56.96 | 75.63 | 2.47 |
| V | 2  | 96.36 | 63.68 | 3.40 |
| V | 3  | 76.92 | 65.30 | 3.05 |
| V | 5  | 43.01 | 75.83 | 1.65 |
| V | 6  | 58.73 | 62.56 | 2.68 |
| V | 7  | 84.46 | 87.21 | 1.65 |
| V | 8  | 54.65 | 67.53 | 1.36 |
| V | 9  | 59.62 | 65.92 | 0.89 |
| V | 10 | 81.16 | 80.10 | 1.74 |
| V | 11 | 71.43 | 57.61 | 2.05 |
| V | 12 | 61.54 | 82.89 | 1.47 |
| V | 13 | 67.59 | 59.01 | 1.18 |
| V | 14 | 69.14 | 63.82 | 1.30 |
| V | 15 | 66.67 | 70.33 | 0.98 |
| V | 16 | 41.84 | 65.18 | 1.83 |
| V | 17 | 51.35 | 65.03 | 2.60 |
| V | 18 | 68.38 | 62.84 | 2.34 |
| V | 19 | 70.97 | 67.43 | 2.53 |
| V | 20 | 88.66 | 93.47 | 5.21 |
| V | 21 | 46.77 | 83.36 | 1.28 |
| V | 22 | 81.75 | 68.17 | 1.60 |
| V | 23 | 50.91 | 64.03 | 0.36 |
| V | 24 | 86.73 | 81.45 | 3.00 |
| V | 25 | 94.63 | 73.12 | 3.93 |
| V | 27 | 84.52 | 69.44 | 1.33 |
| V | 28 | 53.47 | 79.22 | 0.85 |
| V | 29 | 29.51 | 71.78 | 1.50 |
| V | 30 | 57.89 | 78.76 | 1.42 |
| V | 31 | 63.64 | 71.13 | 1.60 |
| V | 32 | 91.89 | 67.63 | 1.88 |
| V | 33 | 72.92 | 71.44 | 3.56 |
| V | 34 | 70.83 | 60.28 | 2.89 |
| V | 35 | 79.27 | 72.76 | 2.97 |
| V | 37 | 83.75 | 75.54 | 0.54 |
| V | 38 | 95.41 | 74.83 | 2.62 |
| V | 39 | 46.39 | 72.94 | 1.42 |
| V | 40 | 70.53 | 71.79 | 1.67 |
| V | 43 | 73.10 | 66.73 | 1.27 |
| V | 44 | 92.22 | 58.73 | 3.44 |
| V | 45 | 62.70 | 68.89 | 3.96 |
| V | 46 | 77.27 | 65.47 | 3.12 |

|   |    |        |       |      |
|---|----|--------|-------|------|
| V | 47 | 59.02  | 60.81 | 0.79 |
| V | 48 | 79.12  | 74.82 | 0.92 |
| V | 49 | 69.51  | 60.96 | 2.92 |
| V | 51 | 67.07  | 71.71 | 2.86 |
| V | 52 | 100.00 | 89.58 | 1.72 |
| V | 54 | 84.04  | 55.19 | 1.24 |
| V | 55 | 70.97  | 84.15 | 1.58 |
| V | 56 | 73.53  | 77.15 | 1.57 |
| V | 57 | 90.63  | 61.62 | 0.72 |
| V | 58 | 85.51  | 69.87 | 1.75 |
| V | 59 | 85.19  | 74.29 | 1.79 |
| V | 60 | 78.22  | 84.67 | 2.60 |
| V | 61 | 95.88  | 74.66 | 1.56 |
| V | 62 | 74.42  | 67.07 | 2.01 |
| V | 63 | 66.30  | 73.47 | 1.90 |
| V | 64 | 58.10  | 71.62 | 1.31 |
| V | 65 | 71.29  | 50.09 | 2.13 |
| V | 66 | 68.94  | 69.70 | 1.75 |
| V | 67 | 81.34  | 59.97 | 1.62 |
| V | 68 | 62.60  | 64.84 | 2.29 |
| V | 69 | 42.86  | 70.96 | 2.28 |
| V | 70 | 74.81  | 56.66 | 0.89 |
| V | 71 | 60.75  | 57.39 | 5.16 |
| V | 72 | 45.45  | 69.29 | 0.51 |
| V | 73 | 55.75  | 64.80 | 3.71 |
| V | 74 | 75.00  | 90.38 | 1.37 |
| V | 75 | 100.00 | 75.92 | 1.46 |
| V | 76 | 51.02  | 69.77 | 2.65 |
| V | 77 | 85.19  | 71.82 | 0.80 |
| V | 78 | 47.31  | 80.58 | 2.64 |
| V | 79 | 7.79   | 72.26 | 0.95 |
| V | 80 | 73.47  | 63.62 | 2.77 |
| V | 81 | 82.72  | 67.39 | 4.65 |
| V | 82 | 84.21  | 65.65 | 2.18 |
| V | 83 | 71.30  | 69.70 | 2.23 |
| V | 84 | 67.29  | 71.05 | 3.01 |
| V | 85 | 48.65  | 78.82 | 1.78 |
| V | 86 | 65.63  | 62.19 | 1.25 |
| V | 87 | 65.49  | 74.14 | 1.56 |
| V | 88 | 63.89  | 70.39 | 0.74 |
| V | 89 | 44.07  | 74.84 | 2.71 |
| V | 90 | 56.67  | 61.75 | 1.05 |

|   |     |        |       |      |
|---|-----|--------|-------|------|
| V | 92  | 88.64  | 76.26 | 1.48 |
| V | 93  | 54.46  | 66.30 | 2.68 |
| V | 95  | 63.11  | 62.87 | 0.96 |
| V | 96  | 37.86  | 65.46 | 1.82 |
| V | 97  | 50.38  | 75.32 | 0.87 |
| V | 98  | 59.55  | 65.07 | 3.16 |
| V | 99  | 80.70  | 72.18 | 5.70 |
| V | 100 | 95.00  | 81.43 | 1.67 |
| V | 101 | 73.39  | 72.19 | 3.82 |
| V | 102 | 90.07  | 77.50 | 2.28 |
| V | 103 | 38.82  | 84.26 | 2.50 |
| V | 104 | 71.29  | 72.20 | 2.01 |
| V | 105 | 81.40  | 64.18 | 2.32 |
| V | 108 | 49.06  | 62.74 | 2.47 |
| V | 109 | 78.35  | 68.77 | 0.67 |
| V | 110 | 100.00 | 85.55 | 2.13 |
| V | 111 | 23.47  | 74.34 | 2.85 |
| V | 112 | 56.03  | 73.23 | 3.78 |
| V | 113 | 98.95  | 59.50 | 2.96 |
| V | 114 | 75.34  | 85.44 | 2.14 |
| V | 115 | 94.67  | 82.02 | 1.07 |
| V | 116 | 89.32  | 81.21 | 1.35 |
| V | 117 | 97.70  | 72.79 | 2.26 |
| V | 119 | 100.00 | 67.11 | 2.75 |
| V | 120 | 100.00 | 66.16 | 1.56 |

---

<sup>1</sup> GEBV values are derived using the KGD-GBLUP method.

<sup>2</sup> Standard errors of the GEBV values are shown.
